# Supplementary material for: Targeted NGS, array-CGH, and patient-derived tumor xenografts for precision medicine in advanced breast cancer: a single-center prospective study
Source: PubMed Central journal article supplement (PMC5346725; doi:10.18632/oncotarget.12714), 2016-10-18
Supplement: oncotarget-07-79428-s001.pdf [file oncotarget-07-79428-s001.pdf]

## Targeted NGS, array-CGH, and patient-derived tumor xenografts for precision medicine in advanced breast cancer: a single-center prospective study

### SUPPLEMENTARY FIGURE

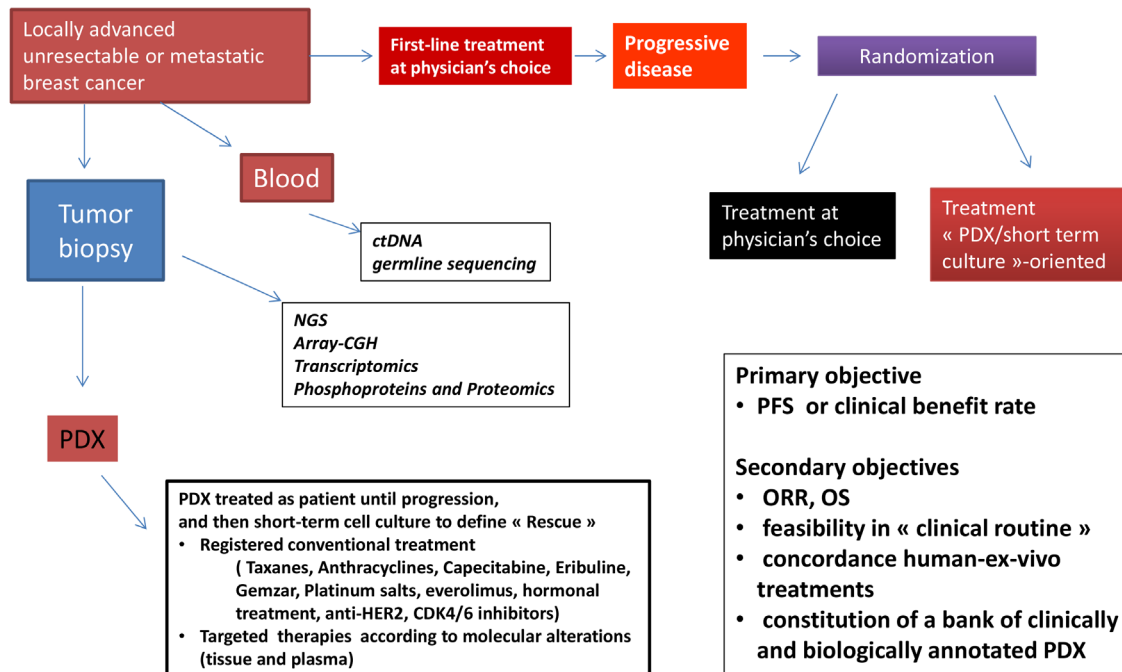

**Supplementary Figure S1: A putative clinical trial testing treatment according to *in-vivo* phenotyping versus empirical treatment.** PDX: patient-derived xenograft, ctDNA: circulating tumor DNA, PFS: progression-free survival, ORR: overall response rate, OS: overall survival.
